# Supplementary material for: A responsive nanoprobe for ratiometric florescence detection of hydroxyl radicals in macrophage polarization
Source: Royal Society of Chemistry journal article supplement (doi:10.1039/d4tb01934b), 2024-01-01
Supplement: d4tb01934b1.pdf [file d4tb01934b1.pdf]

## Supporting information

# **Responsive Nanoprobe for Ratiometric Florescence Detection of Hydroxyl Radical in Macrophage Polarization**

Mazen Alanazi,<sup>a</sup> Miaomiao Wu,<sup>a</sup> Jiayi Yong,<sup>a</sup> Zexi Zhang,<sup>a</sup> Huayue Zhang,<sup>a</sup> Dihua Tian,<sup>a</sup> Run Zhang\*<sup>a</sup>

<sup>a</sup> Australian Institute for Bioengineering and Nanotechnology (AIBN), The University of Queensland, St Lucia, QLD 4072, Australia.

E-mail: r.zhang@uq.edu.au

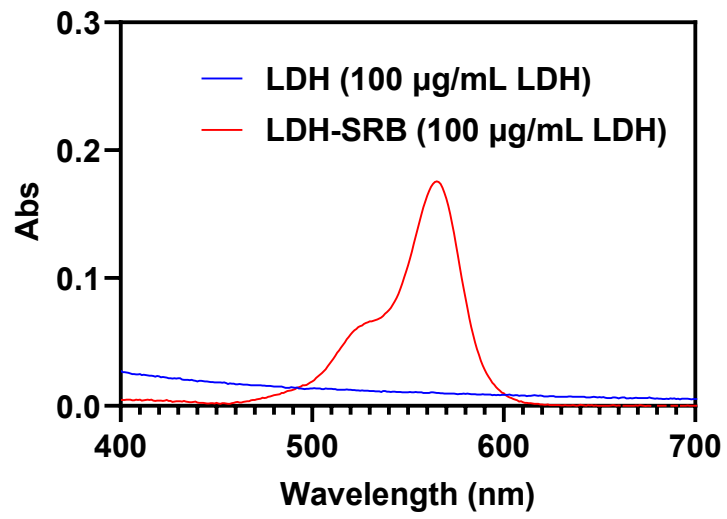

**Fig. S1.** Absorption spectra of 100 µg/mL of LDH and 100 µg/mL of LDH-SRB.

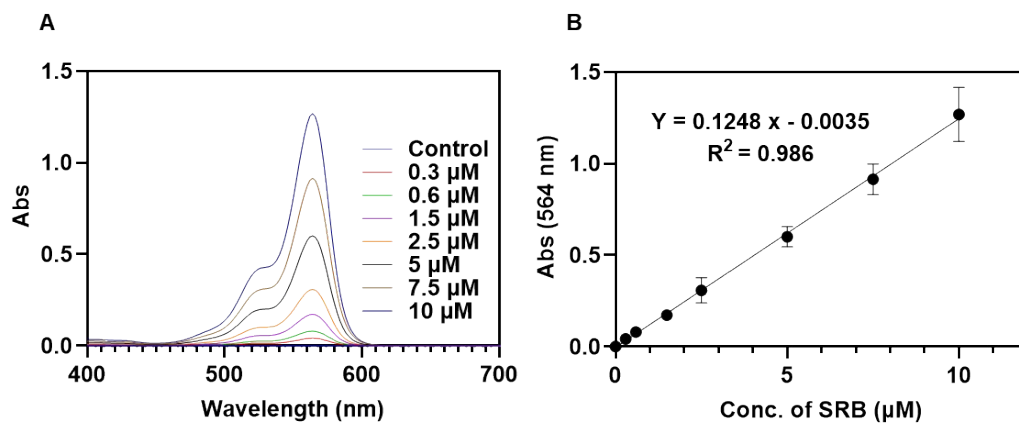

**Fig. S2.** The standard curve for SRB analysis. (A): The absorption spectra of SRB over different concentrations (0 to 10 μM). (B): The linearity of absorbance at 564 nm against SRB concentrations.

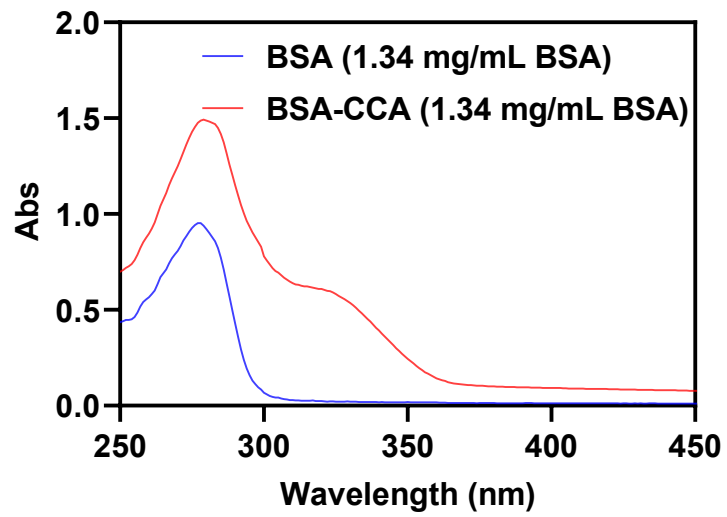

**Fig. S3.** The absorption spectra of 1.34 mg/mL of BSA and 1.34 mg/mL of BSA-CCA.

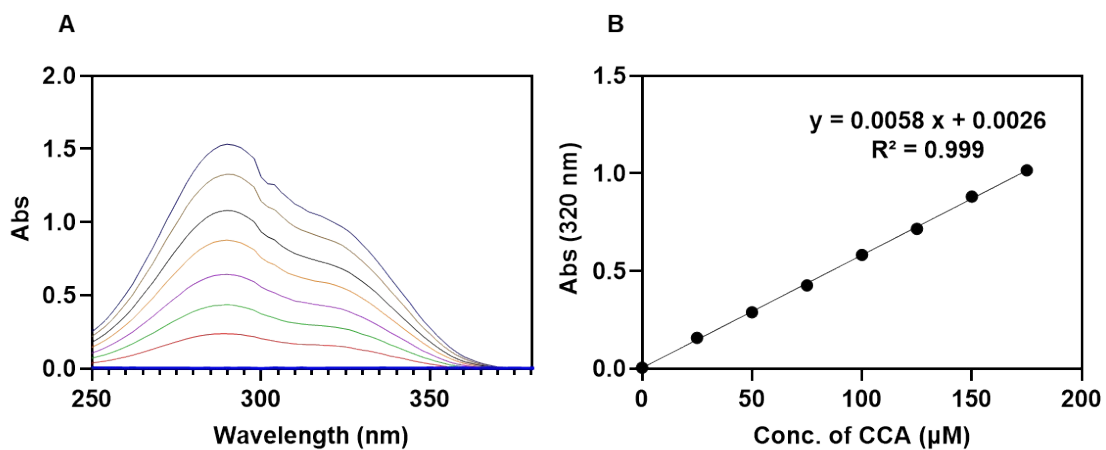

**Fig. S4.** The standard curve for CCA analysis. (A): The absorption spectra of CCA over different concentrations (0 to 175  $\mu\text{M}$ ). (B): The linearity of absorbance at 320 nm against CCA concentrations.

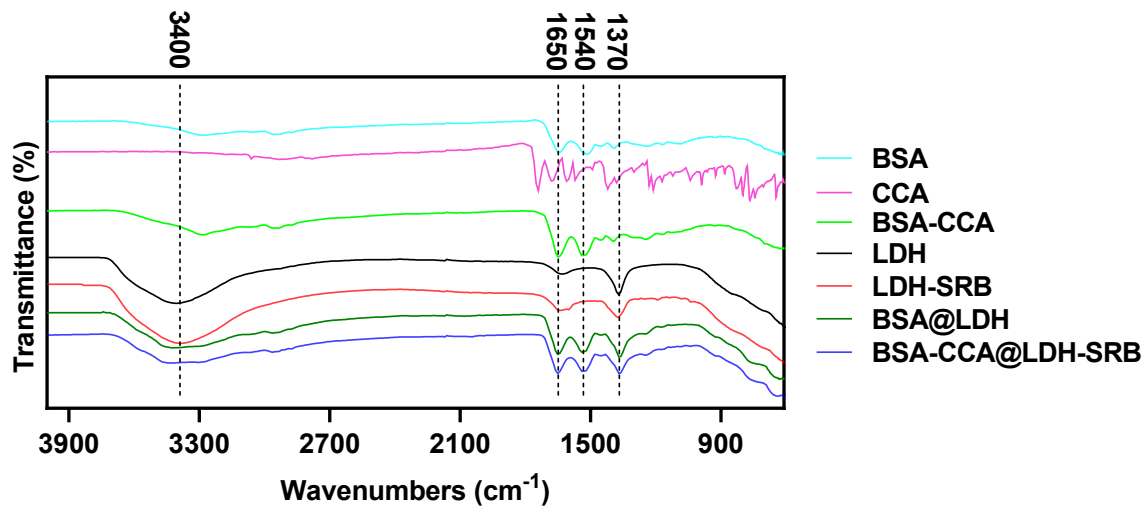

**Fig. S5.** FTIR spectra of BSA, CCA, BSA-CCA, LDH, LDH-SRB, BSA@LDH, and BSA-CCA@LDH-SRB.

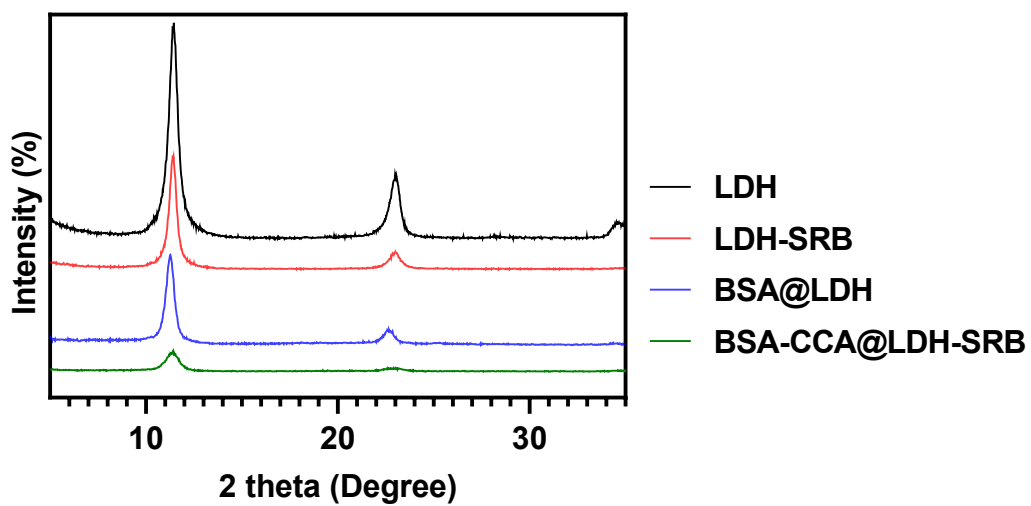

**Fig. S6.** XRD patterns of LDH, LDH-SRB, BSA@LDH, and BSA-CCA@LDH-SRB.

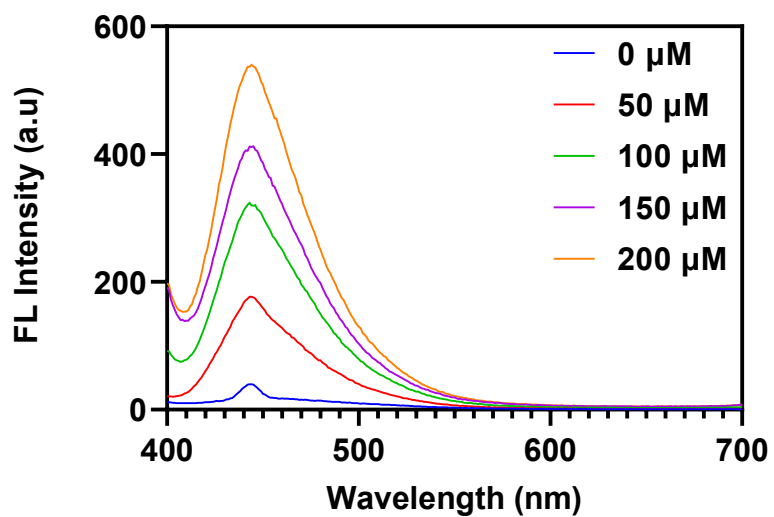

**Fig. S7.** The fluorescence analysis of BSA-CCA over a range of  $\bullet\text{OH}$  (0-200  $\mu\text{M}$ ) in PBS buffer of pH 7.4.



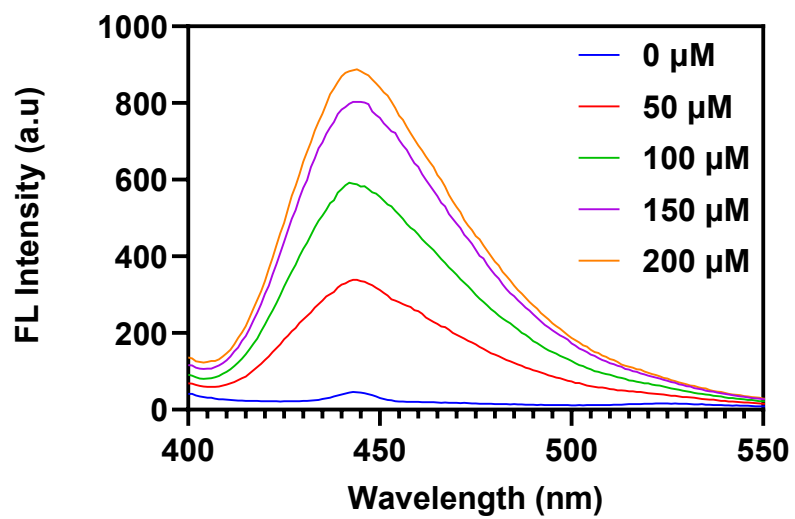

**Fig. S8.** The fluorescence analysis of BSA-CCA@LDH over a range of  $\bullet\text{OH}$  (0-200  $\mu\text{M}$ ) in PBS buffer of pH 7.4.

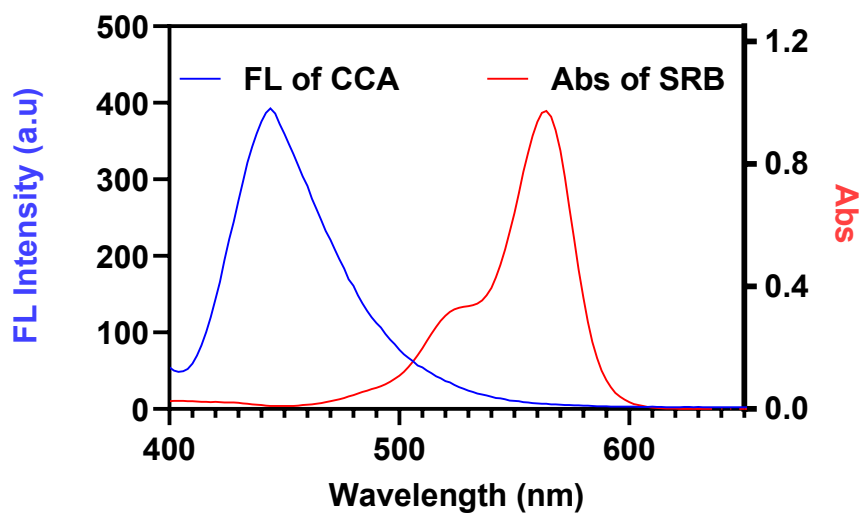

**Fig. S9.** The spectra of CCA's emission and SRB's absorption.

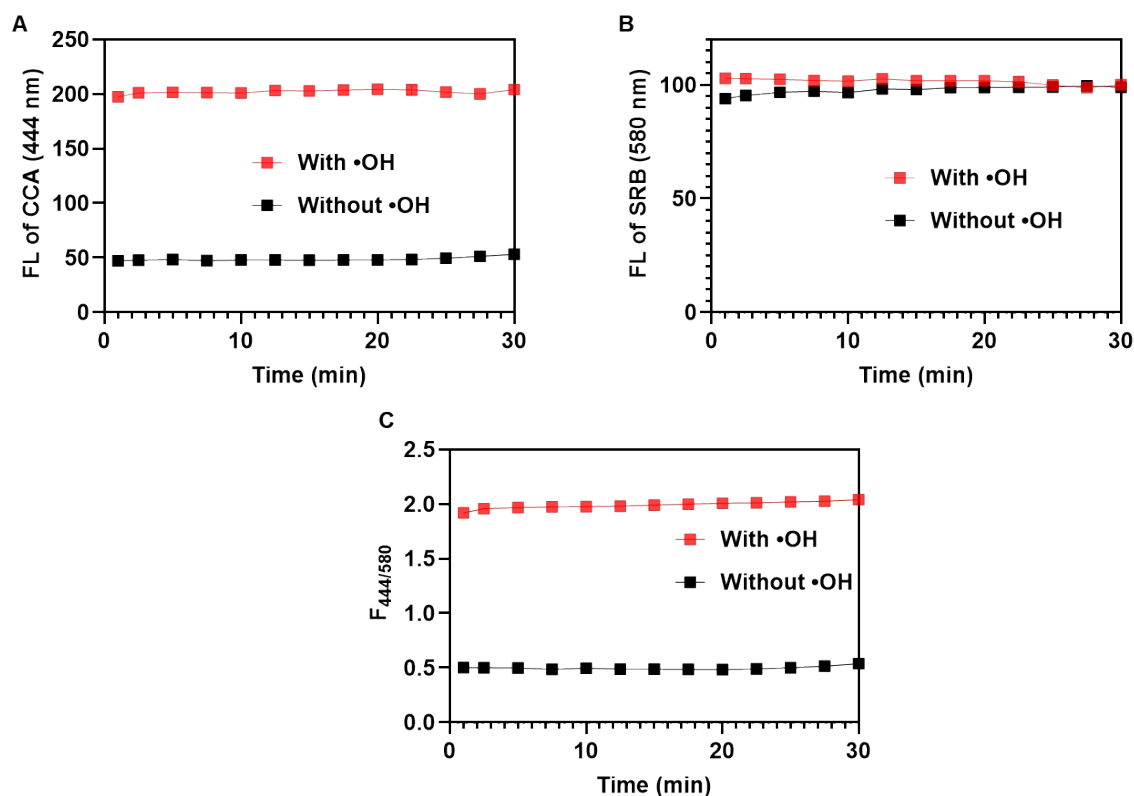

**Fig. S10.** Time dependent fluorescence analysis of the changes of  $F_{444/580}$  ratio in the absence and presence of  $\bullet\text{OH}$ . (A) The fluorescence analysis (CCA 444 nm) of BSA-CCA@LDH-SRB response over 30 min with and without  $\bullet\text{OH}$ . (B) The fluorescence analysis (SRB 580 nm) of BSA-CCA@LDH-SRB response over 30 min with and without  $\bullet\text{OH}$ . (C) Fluorescence of  $F_{444/580}$  ratio over 30 min in the presence and absence of  $\bullet\text{OH}$ .

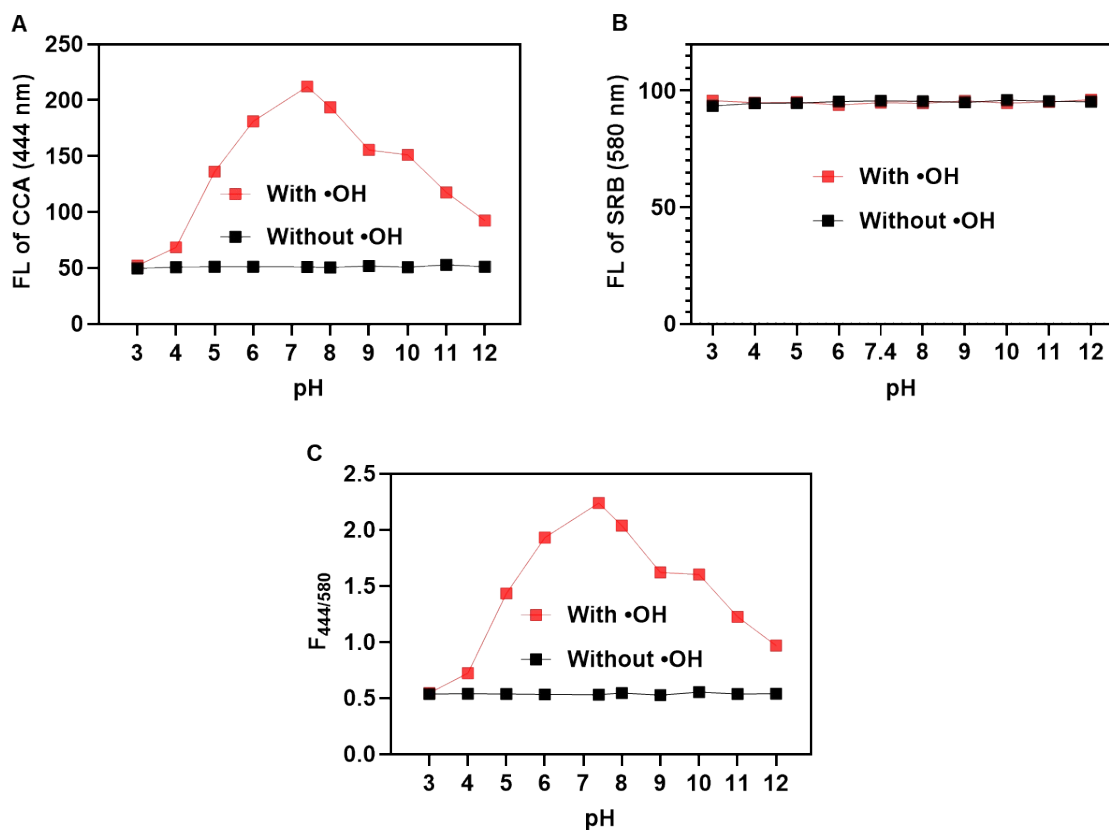

**Fig. S11.** Fluorescence analysis of the changes of  $F_{444/580}$  ratio at different pH. (A) The fluorescence analysis (CCA 444 nm) of BSA-CCA@LDH-SRB response over a wide range of pH with and without  $\bullet\text{OH}$ . (B) The fluorescence analysis (SRB 580 nm) of BSA-CCA@LDH-SRB response over a wide range of pH with and without  $\bullet\text{OH}$ . (C) Fluorescence of  $F_{444/580}$  ratio over a wide range of pH in the presence and absence of  $\bullet\text{OH}$ .

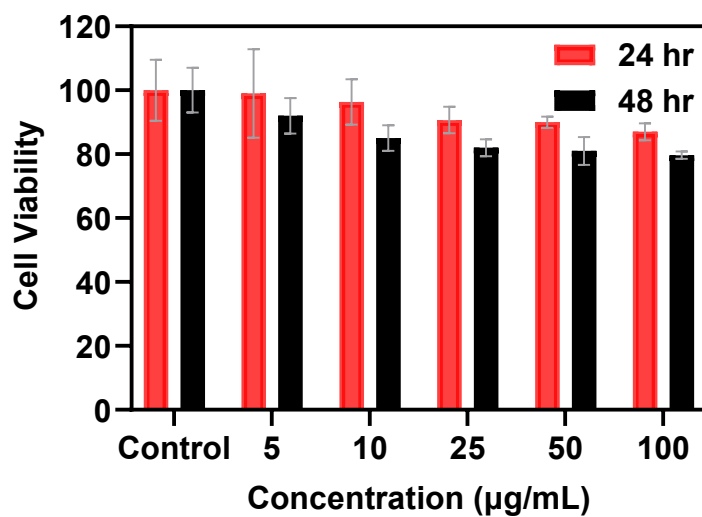

**Fig. S12.** Viability of RAW246.7 cells incubated with BSA-CCA@LDH-SRB at different concentrations (0 to 100 µg/mL) over 24 and 48 h.

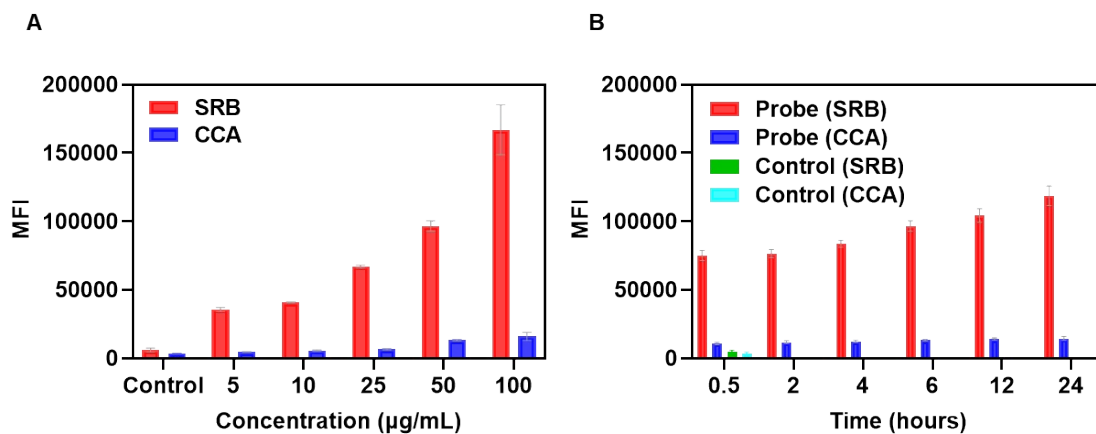

**Fig. S13.** Cellular internalisation analysis of BSA-CCA@LDH-SRB in RAW246.7. (A) The cellular uptake of BSA-CCA@LDH-SRB over various concentrations in RAW 246.7 cells. (B) The time-dependent cellular uptake of 50 µg/mL BSA-CCA@LDH-SRB in RAW 246.7 cells.

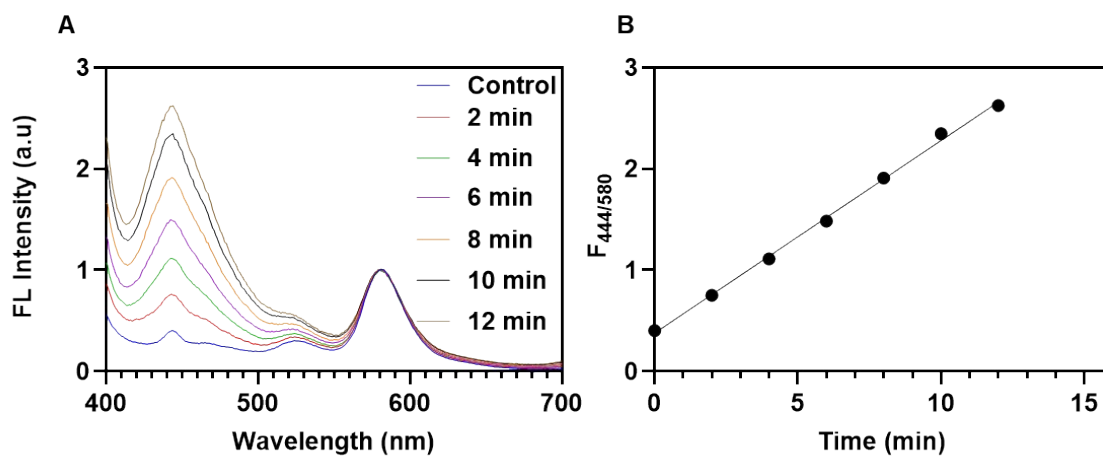

**Fig. S14.** The fluorescence analysis ( $F_{444/580}$  ratio) of BSA-CCA@LDH-SRB response to ultrasound (US) treatment in PBS buffer of pH 7.4.

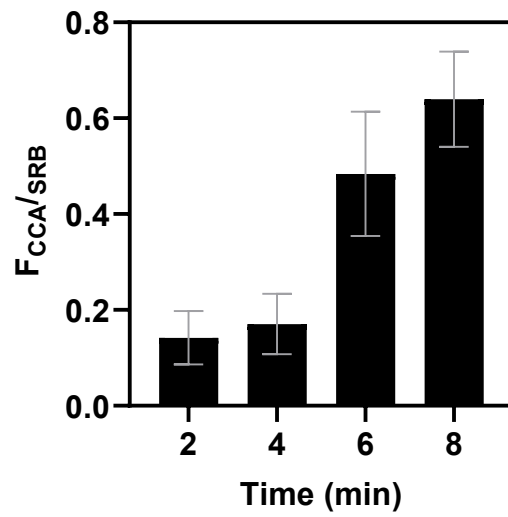

**Fig. S15.** The MFI of RAW264.7 cells incubated with BSA-CCA@LDH-SRB for US treatment over different time points (0 to 8 min).



**Table. S1.** Responsive nanoprobes for detection of •OH.

| <b>Probe</b>                  | <b>LOD</b> | <b>Em<br/>(nm)</b> | <b>Fluorescence<br/>signal type</b> | <b>Application</b>                                       | <b>Ref</b>   |
|-------------------------------|------------|--------------------|-------------------------------------|----------------------------------------------------------|--------------|
| <b>BSA-CCA@LDH-SRB</b>        | 12.6 nM    | 444,<br>580        | Ratiometric                         | Detection of •OH in<br>macrophage<br>polarisation        | This<br>work |
| <b>CONER</b>                  | 0.73 µM    | 450,<br>528        | Ratiometric                         | Detection of •OH in<br>MCF-7 cells                       | [1]          |
| <b>ROX@SiO<sub>2</sub></b>    | 1.65 µM    | 455,<br>620        | Ratiometric                         | Detection of •OH in<br>HeLa cells                        | [2]          |
| <b>CCA@TPP@CDs</b>            | 70 nM      | 451,<br>577        | Ratiometric                         | Detection of •OH in<br>RAW 264.7 cells                   | [3]          |
| <b>TPA@CDs</b>                | 0.25 µM    | 326,<br>423        | Ratiometric                         | Detection of •OH in<br>environmental samples             | [4]          |
| <b>AuNC@HPF</b>               | 0.68 µM    | 515,<br>637        | Ratiometric                         | Detection of •OH in<br>HeLa cells                        | [5]          |
| <b>UCNP-ICG</b>               | 100 pM     | 654,<br>540        | Ratiometric                         | Detection of •OH in live<br>hepatocyte                   | [6]          |
| <b>Brite/DEVD@LMWC<br/>NP</b> | NA         | 663                | Turn-On                             | Detection of •OH during<br>drug-induced kidney<br>injury | [7]          |
| <b>TPA@GQDs</b>               | 12 nM      | 430                | Turn-On                             | Detection of •OH in<br>HeLa cells                        | [8]          |
| <b>AuNPs</b>                  | NA         | 520                | Turn-On                             | Detection of •OH in L-<br>02 cells                       | [9]          |
| <b>FAM-DNA-AuNPs</b>          | 2.4 nM     | 517                | Turn-On                             | Detection of •OH in<br>macrophages and<br>HepG2 cells    | [10]         |
| <b>mOG-SWUCNPs</b>            | 1.2 fM     | 478                | Turn-On                             | Detection of •OH in<br>HeLa cells and liver<br>tissues   | [11]         |

## References

- [1] G. M. Ganea, P. E. Kolic, B. El-Zahab, I. M. Warner, *Analytical chemistry* **2011**, *83*, 2576-2581.
- [2] S. Liu, J. Zhao, K. Zhang, L. Yang, M. Sun, H. Yu, Y. Yan, Y. Zhang, L. Wu, S. Wang, *Analyst* **2016**, *141*, 2296-2302.
- [3] D. Zhou, H. Huang, Y. Wang, Y. Wang, Z. Hu, X. Li, *Journal of Materials Chemistry B* **2019**, *7*, 3737-3744.
- [4] H. Wang, T. Fu, M. Ai, J. Liu, *Analytical and Bioanalytical Chemistry* **2022**, *414*, 6735-6741.
- [5] M. Zhuang, C. Ding, A. Zhu, Y. Tian, *Analytical chemistry* **2014**, *86*, 1829-1836.
- [6] Q. Guo, Y. Liu, Q. Jia, G. Zhang, H. Fan, L. Liu, J. Zhou, *Analytical chemistry* **2017**, *89*, 4986-4993.
- [7] Y. Tong, X. Huang, M. Lu, B.-Y. Yu, J. Tian, *Analytical chemistry* **2018**, *90*, 3556-3562.
- [8] X. Hai, Z. Guo, X. Lin, X. Chen, J. Wang, *ACS applied materials & interfaces* **2018**, *10*, 5853-5861.
- [9] B. Ma, M. Lu, B.-Y. Yu, J. Tian, *RSC advances* **2018**, *8*, 22062-22068.
- [10] B. Tang, N. Zhang, Z. Chen, K. Xu, L. Zhuo, L. An, G. Yang, *Chemistry—A European Journal* **2008**, *14*, 522-528.
- [11] Z. Li, T. Liang, S. Lv, Q. Zhuang, Z. Liu, *Journal of the American Chemical Society* **2015**, *137*, 11179-11185.
